# Supplementary figures and images for: p73β-Mediated Apoptosis Requires p57kip2 Induction and IEX-1 Inhibition
Source: Oxford University Press journal article supplement (doi:10.1158/0008-5472.can-04-3047), 2005-03-15

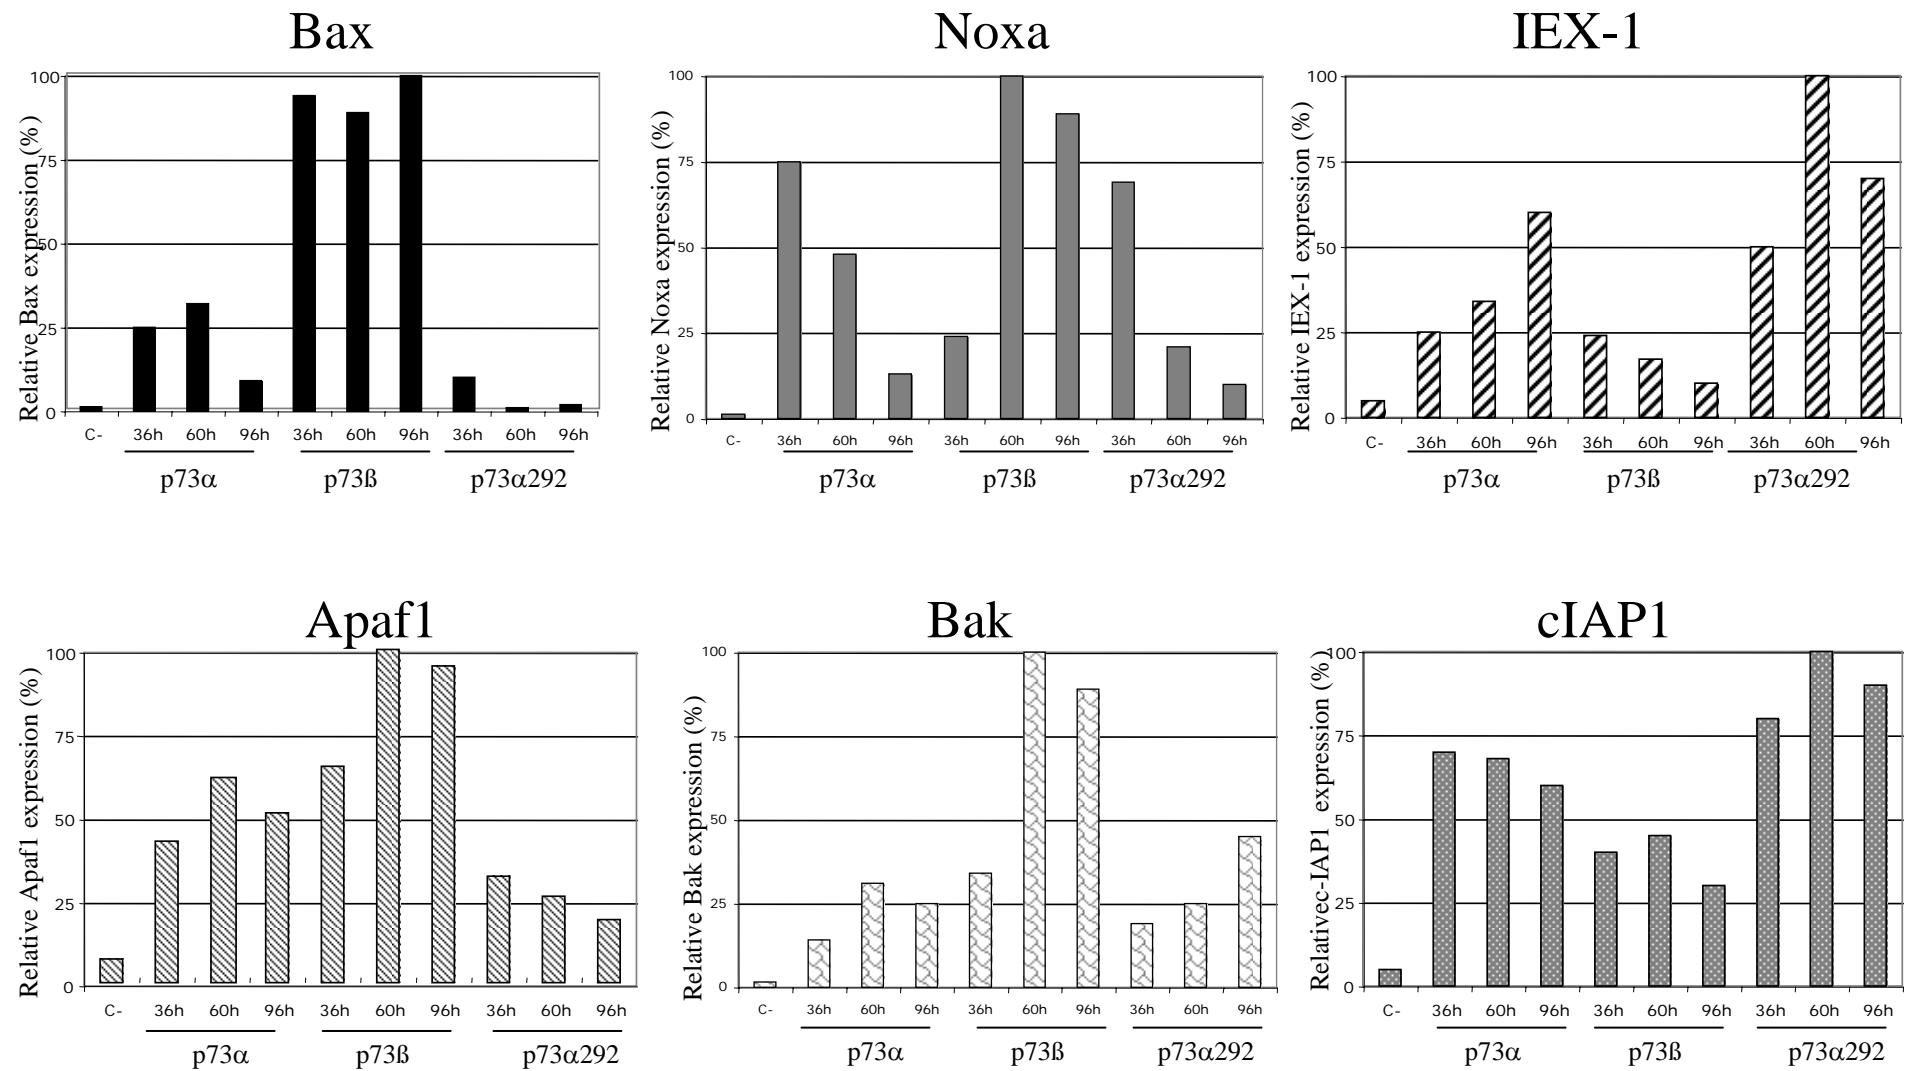

Fig. S1

Supplement: 00085472can043047-sup-figures1.pdf [file 00085472can043047-sup-figures1.pdf]
